# Supplementary material for: Genomic Insights into the Origin of Parasitism in the Emerging Plant Pathogen Bursaphelenchus xylophilus
Source: PLOS journal article supplement (doi:10.1371/journal.ppat.1002219), 2011-09-01
Supplement: S7 (10.1371/journal.ppat.1002219.s007) [file journal.ppat.1002219.s007]

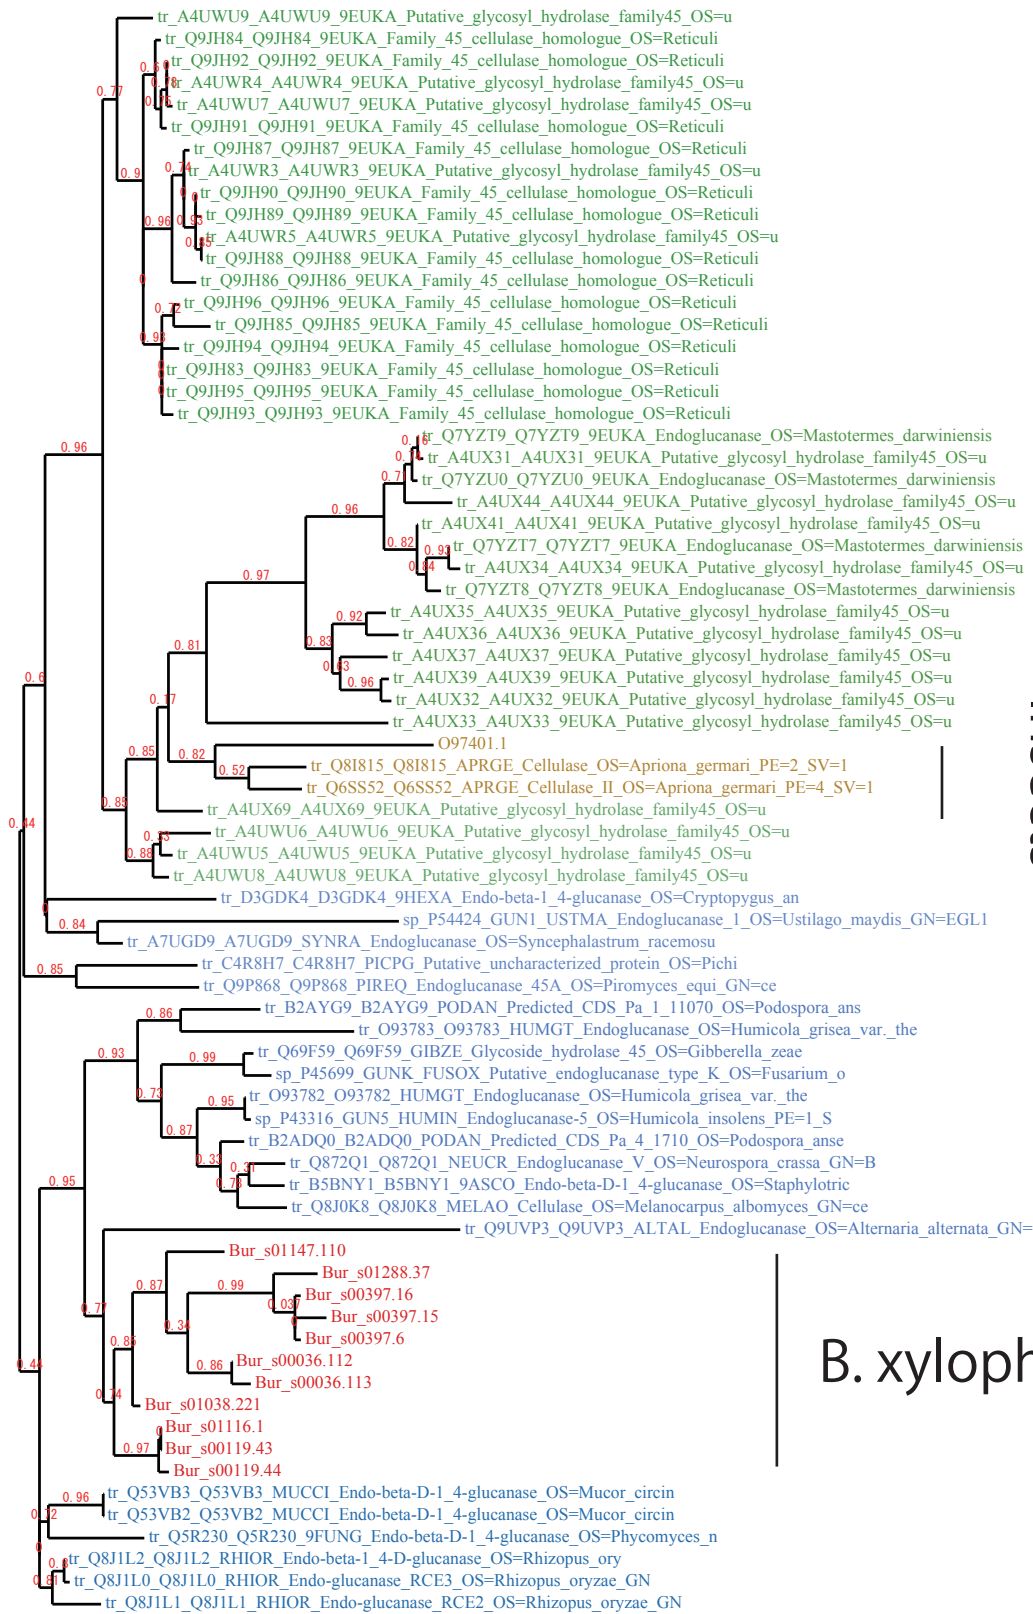

Protists

Insects

Fungi

**B. xylophilus**

0.4
